# Supplementary material
Source: publisher site journal article supplement (https://www.degruyterbrill.com/publication/journal_key/PAC/downloadAsset/PAC_Latex%20Template.zip)
Supplement: Supplementary file 7 [file PAC_Latex%20Template.zip]

DEGRUYTER

MUTTON
