# Supplementary material
Source: publisher site journal article supplement (https://www.degruyterbrill.com/publication/journal_key/PAC/downloadAsset/PAC_Latex%20Template.zip)
Supplement: Supplementary file 10 [file PAC_Latex%20Template.zip]

The image shows the Creative Commons BY-NC-ND license logo. It consists of a circular icon on the left containing the letters 'cc' in a stylized font. To the right of the icon is the text 'BY-NC-ND' in a bold, sans-serif font. The entire logo is set against a black background with a white border.

cc

BY-NC-ND
