# Supplementary material
Source: publisher site journal article supplement (https://www.degruyterbrill.com/publication/journal_key/PAC/downloadAsset/PAC_Latex%20Template.zip)

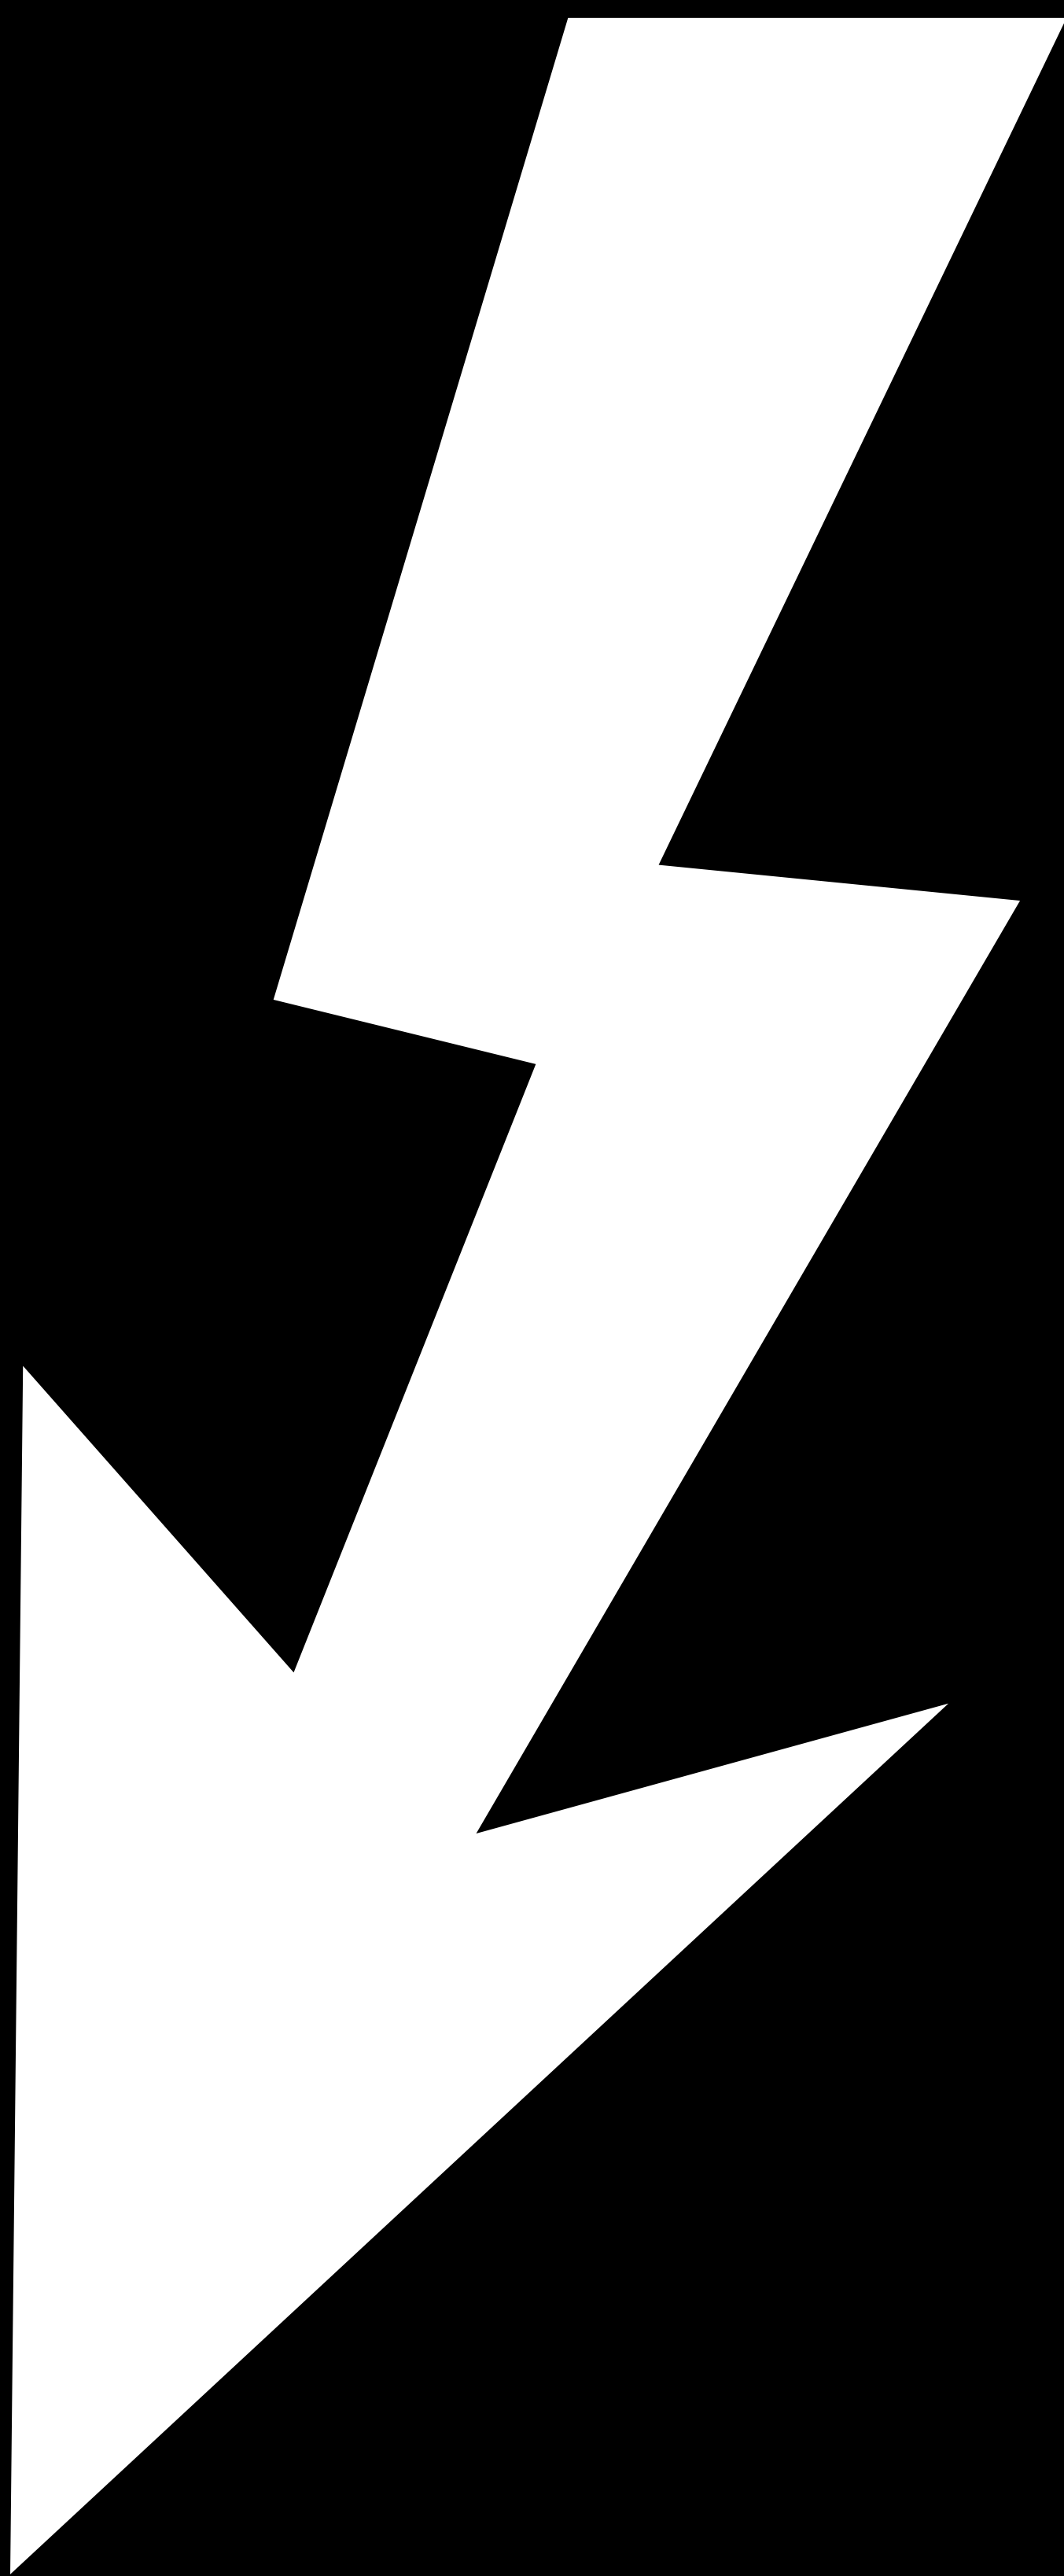

Supplement: Supplementary file 3 [file PAC_Latex%20Template.zip]

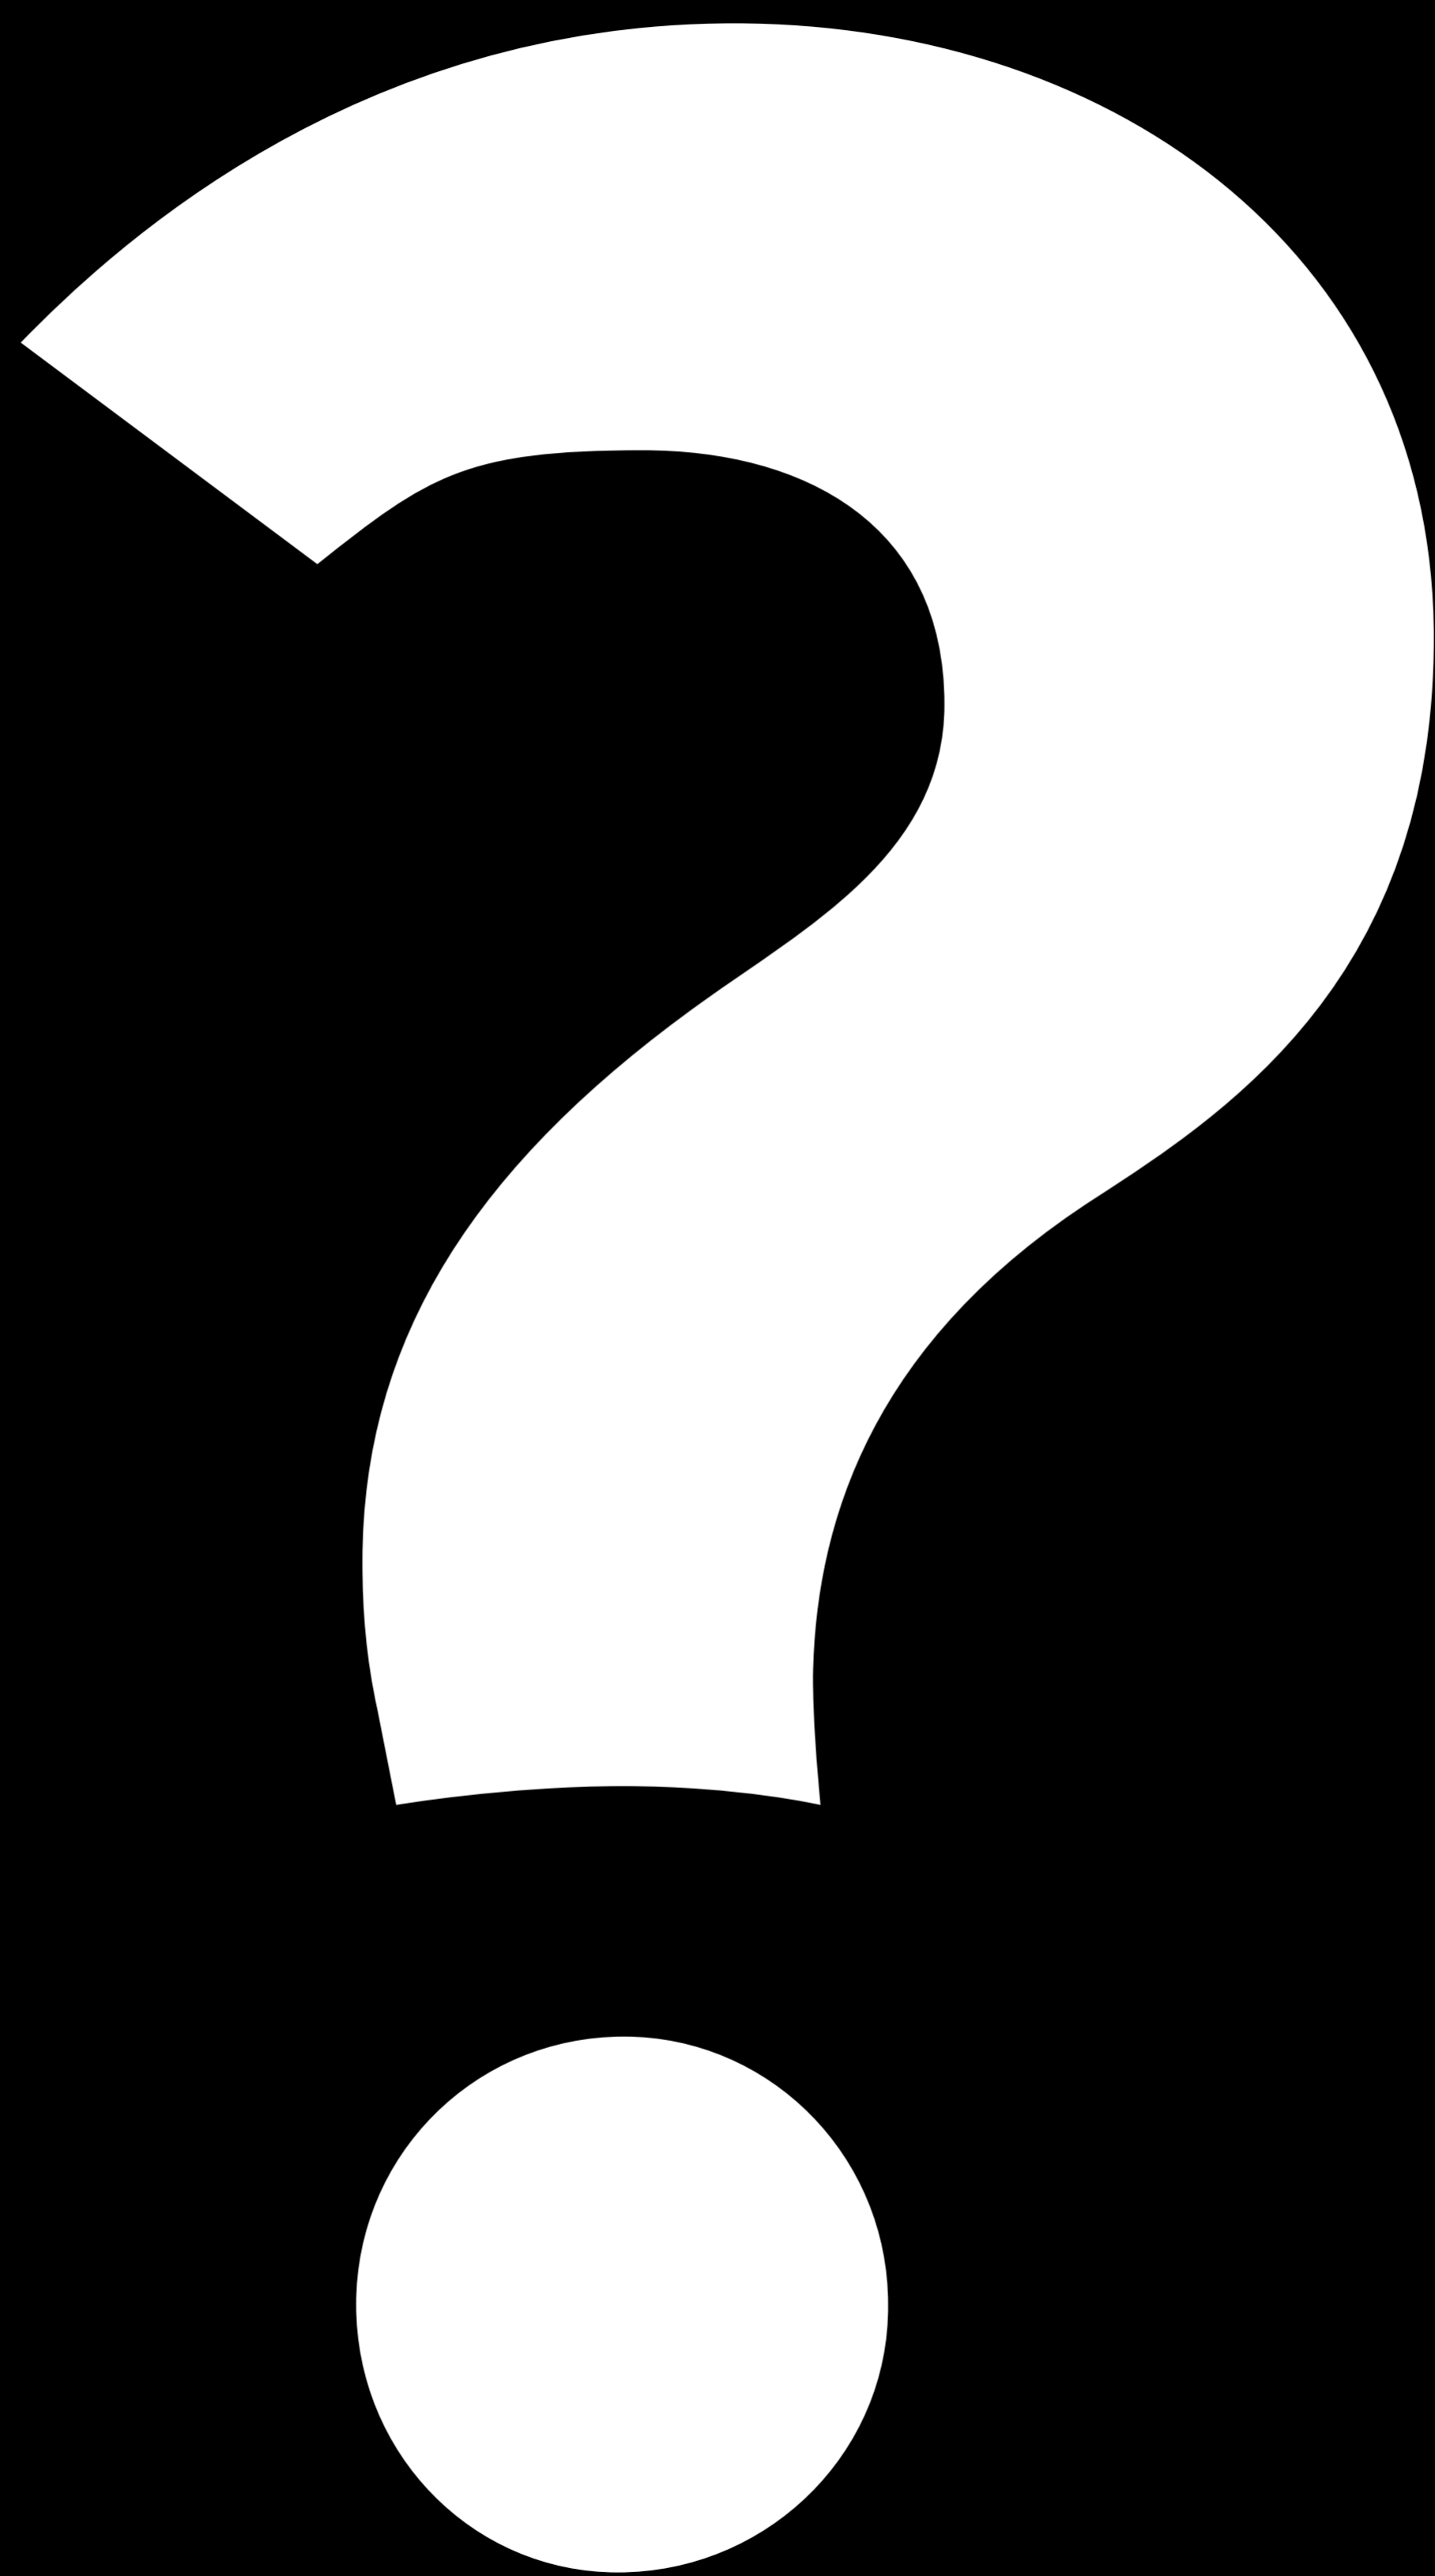

Supplement: Supplementary file 4 [file PAC_Latex%20Template.zip]

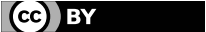

Supplement: Supplementary file 5 [file PAC_Latex%20Template.zip]

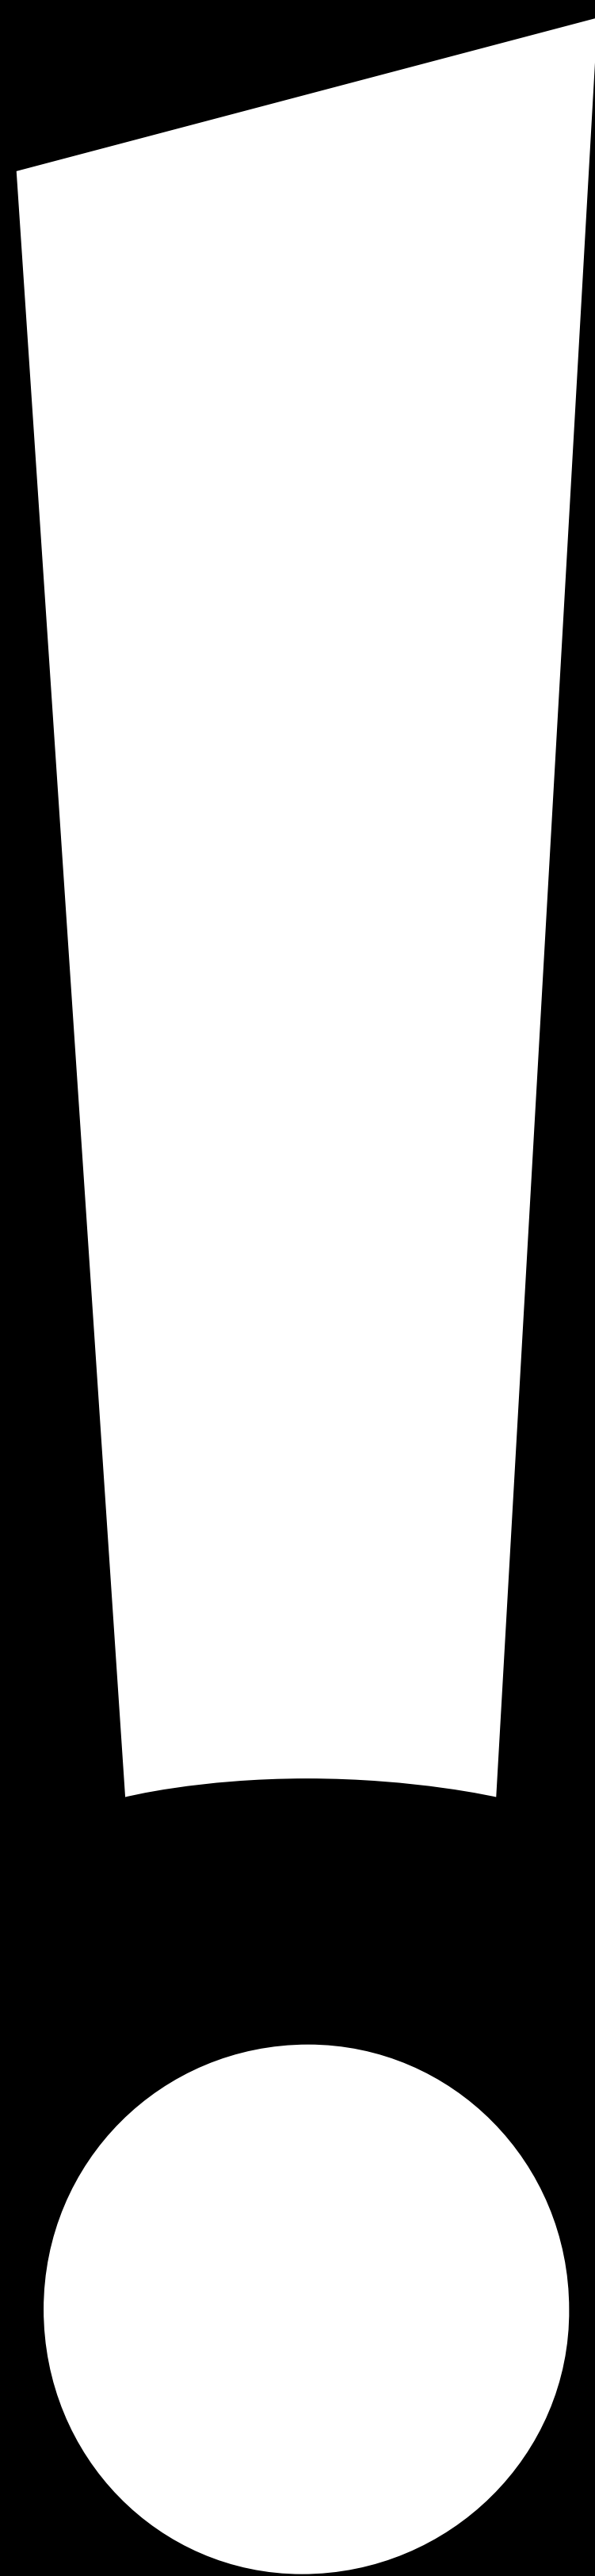

Supplement: Supplementary file 6 [file PAC_Latex%20Template.zip]

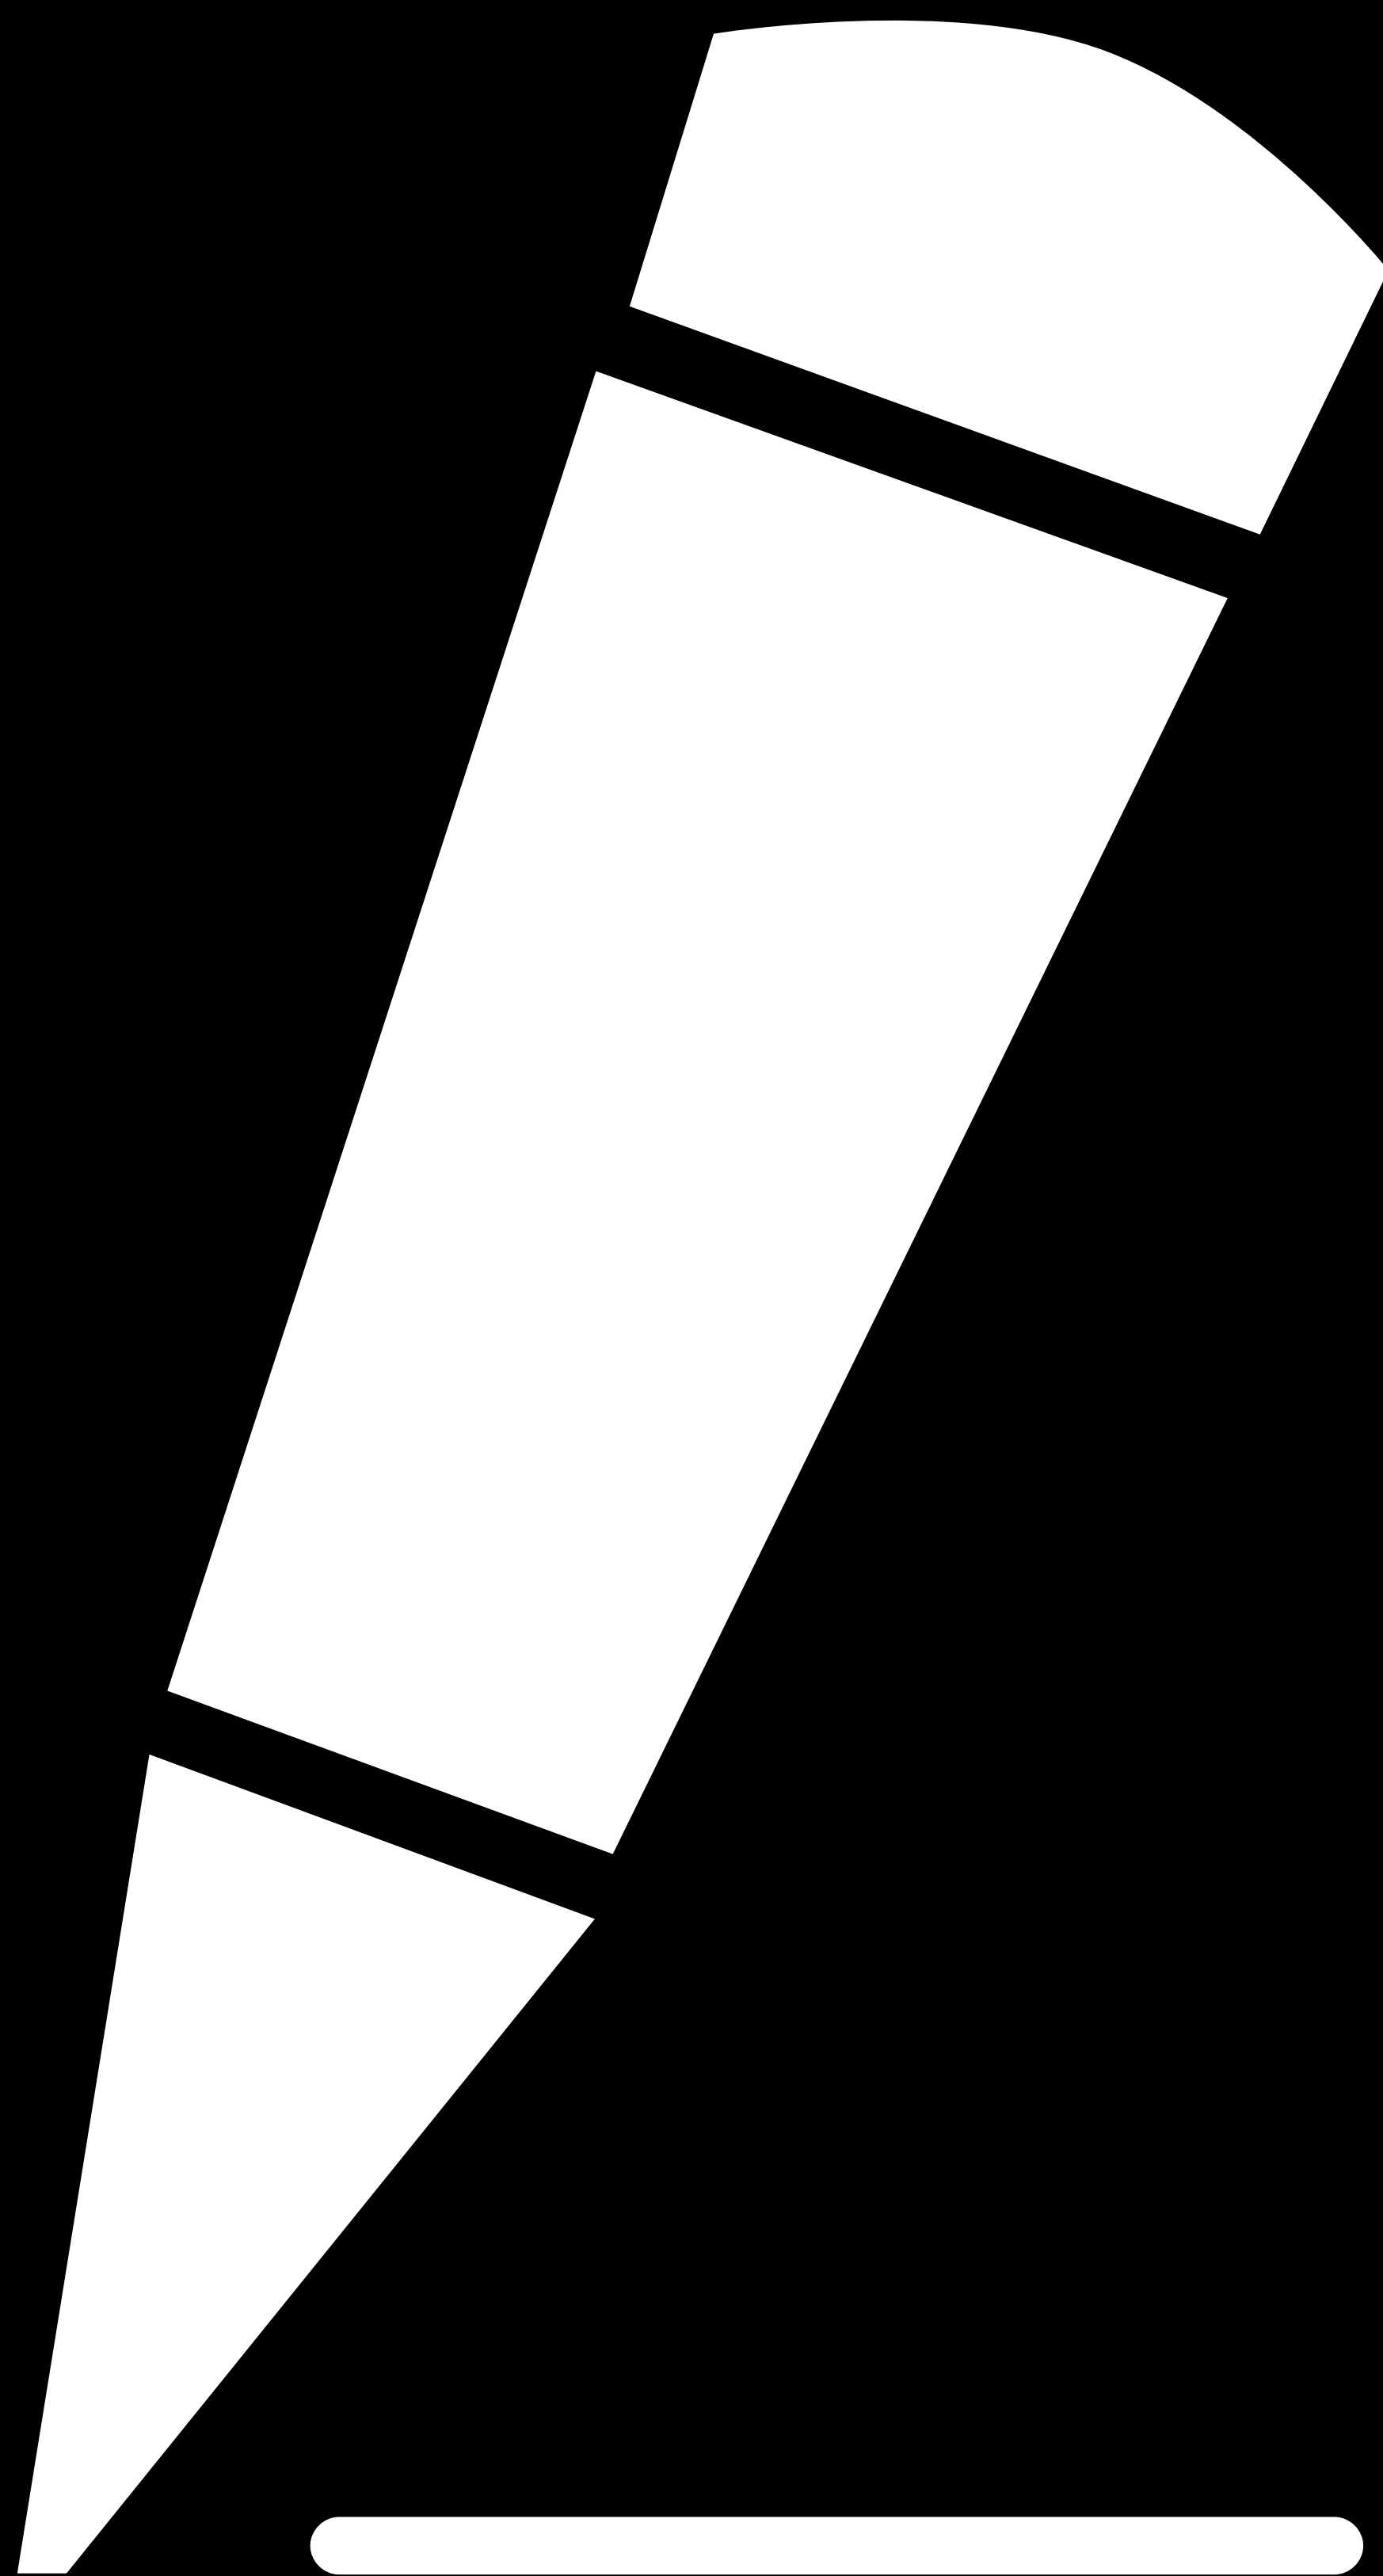

Supplement: Supplementary file 8 [file PAC_Latex%20Template.zip]
